# Supplementary material
Source: PubMed Central journal article supplement (PMC10783857)

# My Food and Bowel Journal

Use this journal to log your food and bowel movements for  
the next week.

**Instructions:**

Use the space provided on the following pages to document your eating habits and bowel movements for the next week. Each page represents a day of the week. Remember to record **every** meal, bowel movement, and accident.

See the example below for completed entry.

Date: Sunday, January 1, 2017

| Time  | Meal/Food Intake                          | BM? | Stool Score | Urgency<br>Y=Yes, N=No | ABL<br>S=Small, M=Medium,<br>L=Large | Comments            |
|-------|-------------------------------------------|-----|-------------|------------------------|--------------------------------------|---------------------|
| 9 am  | Oatmeal                                   |     |             |                        |                                      |                     |
| 11 am |                                           | ✓   | 7           | Y                      |                                      | Ran to the bathroom |
| 12 pm | Almonds<br>Apple                          |     |             |                        |                                      |                     |
| 2 pm  | Brown rice<br>Ground turkey<br>Vegetables |     |             |                        |                                      |                     |
| 6 pm  | Chicken<br>Mashed potatoes<br>Gravy       |     |             |                        |                                      |                     |
| 7 pm  |                                           | ✓   | 6           | Y                      | M                                    |                     |
|       |                                           |     |             |                        |                                      |                     |

**Bristol Stool Score**

Type 1  
Type 2  
Type 3  
Type 4  
Type 5  
Type 6  
Type 7

**BM = Bowel Movement**  
**ABL = Accidental Bowel Leakage**

Date: Sunday, \_\_\_\_\_

| Time | Meal/Food Intake | BM? | Stool Score | Urgency<br>Y=Yes, N=No | ABL<br>S=Small, M=Medium,<br>L=Large | Comments | Bristol Stool Score                                                                          |
|------|------------------|-----|-------------|------------------------|--------------------------------------|----------|----------------------------------------------------------------------------------------------|
|      |                  |     |             |                        |                                      |          |  Type 1   |
|      |                  |     |             |                        |                                      |          |  Type 2   |
|      |                  |     |             |                        |                                      |          |  Type 3   |
|      |                  |     |             |                        |                                      |          |  Type 4  |
|      |                  |     |             |                        |                                      |          |  Type 5 |
|      |                  |     |             |                        |                                      |          |  Type 6 |
|      |                  |     |             |                        |                                      |          |  Type 7 |
|      |                  |     |             |                        |                                      |          |                                                                                              |
|      |                  |     |             |                        |                                      |          |                                                                                              |

Date: Monday, \_\_\_\_\_

| Time | Meal/Food Intake | BM? | Stool Score | Urgency<br>Y=Yes, N=No | ABL<br>S=Small, M=Medium,<br>L=Large | Comments | Bristol Stool Score                                                                          |
|------|------------------|-----|-------------|------------------------|--------------------------------------|----------|----------------------------------------------------------------------------------------------|
|      |                  |     |             |                        |                                      |          |  Type 1   |
|      |                  |     |             |                        |                                      |          |  Type 2   |
|      |                  |     |             |                        |                                      |          |  Type 3   |
|      |                  |     |             |                        |                                      |          |  Type 4   |
|      |                  |     |             |                        |                                      |          |  Type 5 |
|      |                  |     |             |                        |                                      |          |  Type 6 |
|      |                  |     |             |                        |                                      |          |  Type 7 |
|      |                  |     |             |                        |                                      |          |                                                                                              |
|      |                  |     |             |                        |                                      |          |                                                                                              |

Date: Tuesday, \_\_\_\_\_

| Time | Meal/Food Intake | BM? | Stool Score | Urgency<br>Y=Yes, N=No | ABL<br>S=Small, M=Medium,<br>L=Large | Comments | Bristol Stool Score                                                                          |
|------|------------------|-----|-------------|------------------------|--------------------------------------|----------|----------------------------------------------------------------------------------------------|
|      |                  |     |             |                        |                                      |          |  Type 1   |
|      |                  |     |             |                        |                                      |          |  Type 2   |
|      |                  |     |             |                        |                                      |          |  Type 3   |
|      |                  |     |             |                        |                                      |          |  Type 4   |
|      |                  |     |             |                        |                                      |          |  Type 5 |
|      |                  |     |             |                        |                                      |          |  Type 6 |
|      |                  |     |             |                        |                                      |          |  Type 7 |
|      |                  |     |             |                        |                                      |          |                                                                                              |
|      |                  |     |             |                        |                                      |          |                                                                                              |

Date: Wednesday, \_\_\_\_\_

| Time | Meal/Food Intake | BM? | Stool Score | Urgency<br>Y=Yes, N=No | ABL<br>S=Small, M=Medium,<br>L=Large | Comments | Bristol Stool Score                                                                          |
|------|------------------|-----|-------------|------------------------|--------------------------------------|----------|----------------------------------------------------------------------------------------------|
|      |                  |     |             |                        |                                      |          |  Type 1   |
|      |                  |     |             |                        |                                      |          |  Type 2   |
|      |                  |     |             |                        |                                      |          |  Type 3   |
|      |                  |     |             |                        |                                      |          |  Type 4   |
|      |                  |     |             |                        |                                      |          |  Type 5 |
|      |                  |     |             |                        |                                      |          |  Type 6 |
|      |                  |     |             |                        |                                      |          |  Type 7 |
|      |                  |     |             |                        |                                      |          |                                                                                              |
|      |                  |     |             |                        |                                      |          |                                                                                              |

Date: Thursday, \_\_\_\_\_

| Time | Meal/Food Intake | BM? | Stool Score | Urgency<br>Y=Yes, N=No | ABL<br>S=Small, M=Medium,<br>L=Large | Comments | Bristol Stool Score                                                                          |
|------|------------------|-----|-------------|------------------------|--------------------------------------|----------|----------------------------------------------------------------------------------------------|
|      |                  |     |             |                        |                                      |          |  Type 1   |
|      |                  |     |             |                        |                                      |          |  Type 2   |
|      |                  |     |             |                        |                                      |          |  Type 3   |
|      |                  |     |             |                        |                                      |          |  Type 4   |
|      |                  |     |             |                        |                                      |          |  Type 5 |
|      |                  |     |             |                        |                                      |          |  Type 6 |
|      |                  |     |             |                        |                                      |          |  Type 7 |
|      |                  |     |             |                        |                                      |          |                                                                                              |
|      |                  |     |             |                        |                                      |          |                                                                                              |

Date: Friday, \_\_\_\_\_

| Time | Meal/Food Intake | BM? | Stool Score | Urgency<br>Y=Yes, N=No | ABL<br>S=Small, M=Medium,<br>L=Large | Comments | Bristol Stool Score                                                                          |
|------|------------------|-----|-------------|------------------------|--------------------------------------|----------|----------------------------------------------------------------------------------------------|
|      |                  |     |             |                        |                                      |          |  Type 1   |
|      |                  |     |             |                        |                                      |          |  Type 2   |
|      |                  |     |             |                        |                                      |          |  Type 3   |
|      |                  |     |             |                        |                                      |          |  Type 4   |
|      |                  |     |             |                        |                                      |          |  Type 5 |
|      |                  |     |             |                        |                                      |          |  Type 6 |
|      |                  |     |             |                        |                                      |          |  Type 7 |
|      |                  |     |             |                        |                                      |          |                                                                                              |
|      |                  |     |             |                        |                                      |          |                                                                                              |



Date: Saturday, \_\_\_\_\_

| Time | Meal/Food Intake | BM? | Stool Score | Urgency<br>Y=Yes, N=No | ABL<br>S=Small, M=Medium,<br>L=Large | Comments | Bristol Stool Score                                                                          |
|------|------------------|-----|-------------|------------------------|--------------------------------------|----------|----------------------------------------------------------------------------------------------|
|      |                  |     |             |                        |                                      |          |  Type 1   |
|      |                  |     |             |                        |                                      |          |  Type 2   |
|      |                  |     |             |                        |                                      |          |  Type 3   |
|      |                  |     |             |                        |                                      |          |  Type 4   |
|      |                  |     |             |                        |                                      |          |  Type 5 |
|      |                  |     |             |                        |                                      |          |  Type 6 |
|      |                  |     |             |                        |                                      |          |  Type 7 |
|      |                  |     |             |                        |                                      |          |                                                                                              |
|      |                  |     |             |                        |                                      |          |                                                                                              |

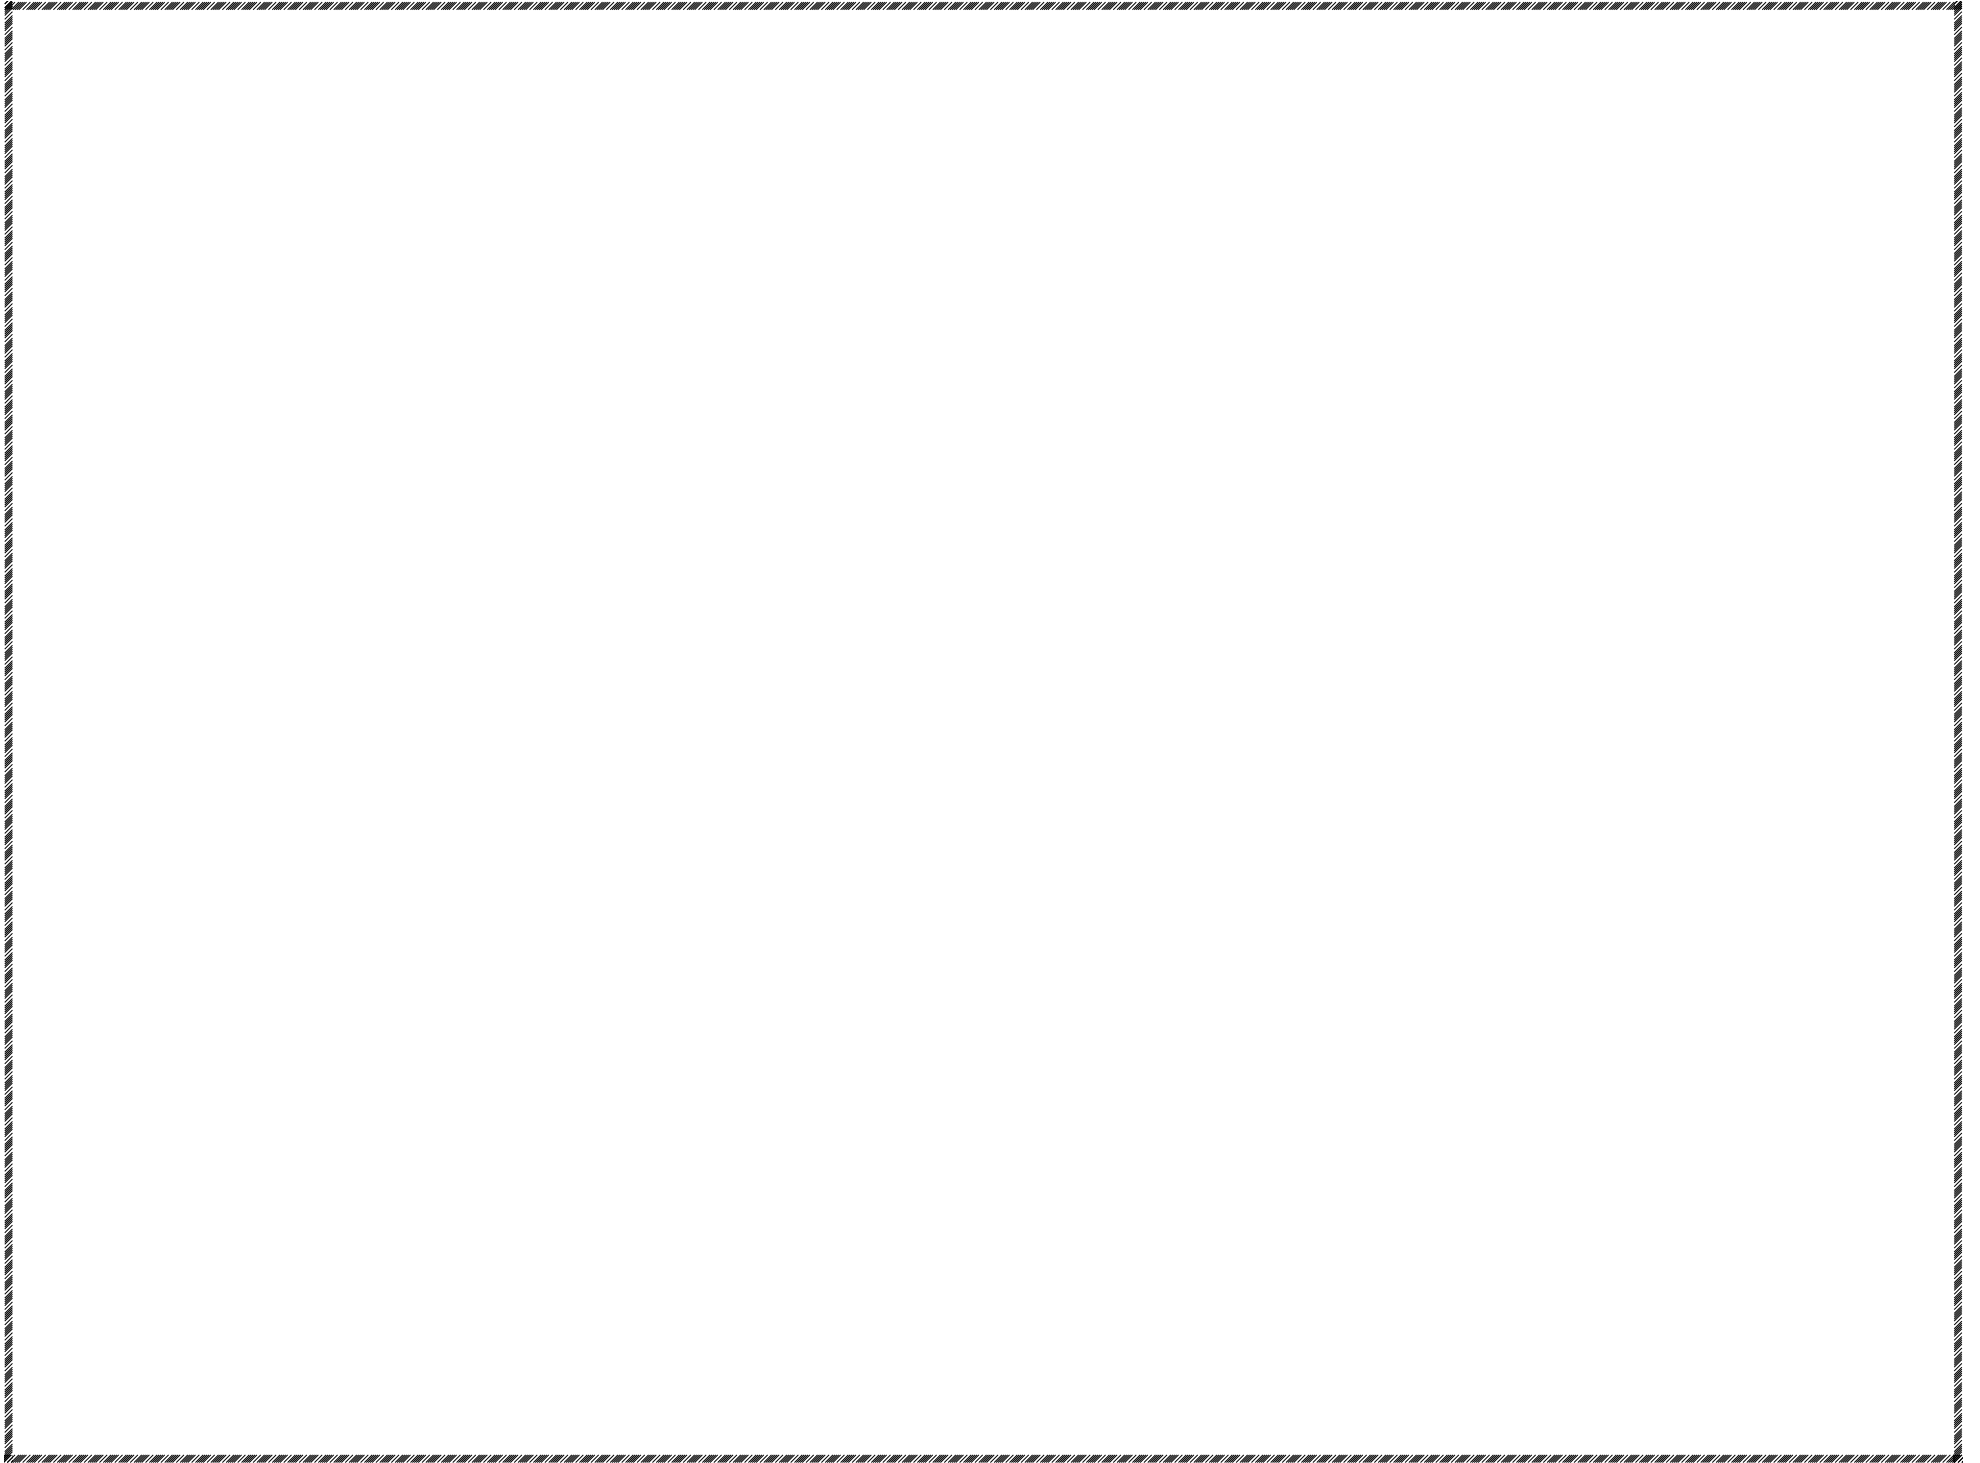

Supplement: NIHMS1948273-supplement-Appendix3.pdf [file NIHMS1948273-supplement-Appendix3.pdf]
